# Supplementary material for: Expression level and clinical significance of LncRNA PVT1 in the serum of patients with LEASO
Source: PeerJ. 2023 Sep 19;11:e16057. doi: 10.7717/peerj.16057 (PMC10516103; doi:10.7717/peerj.16057)
Supplement: Supplemental Information 1 [file peerj-11-16057-s001.xlsx]

## Sheet: Sheet1
Sample Name	Average ct value of PVT1 gene	Average ct value of GAPDH gene	Average ct value of target gene - average ct value of internal reference gene	Average Ct value of control sample target gene - average Ct value of control sample internal reference gene	(Average ct value of target gene in test sample - average ct value of internal reference gene in test sample) - (Average ct value of target gene in control sample - average ct value of internal reference gene in control sample)	2△△ct	2-△△ct
A1	23.7224	25.7443	-2.02186	-2.02186	0	1	1
A2	25.0891	26.4551	-1.36594	-2.02186	0.655921	1.57562	0.63467
A3	23.305	25.6021	-2.29703	-2.02186	-0.275174	0.826351	1.21014
A4	22.9626	25.1757	-2.21308	-2.02186	-0.191222	0.875864	1.14173
A5	30.4359	32.4943	-2.0584	-2.02186	-0.0365385	0.974991	1.02565
A6	30.4018	32.3673	-1.9655	-2.02186	0.0563562	1.03984	0.96169
A7	29.0853	32.2635	-3.17822	-2.02186	-1.15636	0.448642	2.22895
A8	22.8684	25.8266	-2.95819	-2.02186	-0.936327	0.522562	1.91365
A9	23.6783	25.6143	-1.93599	-2.02186	0.0858641	1.06132	0.94222
A10	21.4935	25.4992	-4.00579	-2.02186	-1.98393	0.2528	3.9557
A11	32.7031	35.8213	-3.11812	-2.02186	-1.09626	0.467727	2.138
A12	31.8949	35.218	-3.32307	-2.02186	-1.30121	0.405785	2.46436
A13	32.7333	36.7487	-4.01545	-2.02186	-1.99359	0.251114	3.98226
A14	23.8638	25.9422	-2.07844	-2.02186	-0.0565835	0.961538	1.04
A15	22.8035	25.1892	-2.38574	-2.02186	-0.363879	0.777073	1.28688
A16	23.1376	25.1866	-2.04901	-2.02186	-0.0271541	0.981354	1.019
A17	32.5777	34.4818	-1.90412	-2.02186	0.11774	1.08503	0.92163
A18	31.9805	35.4344	-3.45391	-2.02186	-1.43205	0.370604	2.6983
A19	33.2693	35.7739	-2.50468	-2.02186	-0.482817	0.715579	1.39747
A20	23.4363	26.0325	-2.5962	-2.02186	-0.574344	0.671592	1.489
A21	24.7606	26.6574	-1.89685	-2.02186	0.125006	1.09051	0.917
A22	26.362	26.6368	-0.274759	-2.02186	1.7471	3.35683	0.2979
A23	30.2137	33.0929	-2.87915	-2.02186	-0.857288	0.551989	1.81163
A24	31.4027	33.4781	-2.07539	-2.02186	-0.0535284	0.963577	1.0378
A25	30.4543	33.3968	-2.94245	-2.02186	-0.920591	0.528293	1.89289
A26	21.6032	25.1207	-3.5175	-2.02186	-1.49564	0.354623	2.8199
A27	22.5617	25.3053	-2.74354	-2.02186	-0.721679	0.606391	1.6491
A28	22.5921	25.1323	-2.54023	-2.02186	-0.518374	0.698158	1.43234
A29	22.5484	25.2593	-2.71089	-2.02186	-0.689031	0.62027	1.6122
A30	23.5086	25.4832	-1.97465	-2.02186	0.0472042	1.03326	0.96781
A31	23.1617	25.4609	-2.29925	-2.02186	-0.27739	0.825083	1.212
A32	29.1932	31.138	-1.94482	-2.02186	0.077041	1.05485	0.948
A33	29.576	31.4437	-1.86777	-2.02186	0.154088	1.11272	0.8987
A34	29.1176	31.6363	-2.51878	-2.02186	-0.496922	0.708617	1.4112
A35	26.8782	29.669	-2.79078	-2.02186	-0.768925	0.586854	1.704
A36	25.3994	29.1078	-3.70847	-2.02186	-1.68661	0.310655	3.219
A37	25.3899	28.8599	-3.46999	-2.02186	-1.44813	0.366495	2.72855
A38	31.5149	34.3014	-2.7865	-2.02186	-0.764643	0.588599	1.69895
A39	31.8992	34.0494	-2.15015	-2.02186	-0.128293	0.914913	1.093
A40	31.3119	33.846	-2.53414	-2.02186	-0.512277	0.701115	1.4263
A41	22.934	24.4097	-1.47579	-2.02186	0.546071	1.4601	0.684883
A42	22.1066	24.0984	-1.99176	-2.02186	0.0301036	1.02109	0.97935
A43	20.8822	24.4638	-3.5816	-2.02186	-1.55974	0.339213	2.948
A44	32.7906	35.0742	-2.28357	-2.02186	-0.261711	0.834098	1.1989
A45	33.9061	36.4104	-2.50429	-2.02186	-0.482435	0.715768	1.3971
A46	33.8466	35.1184	-1.27187	-2.02186	0.749984	1.68177	0.59461
A47	22.1933	24.2965	-2.1032	-2.02186	-0.0813396	0.94518	1.058
A48	21.1524	24.009	-2.85651	-2.02186	-0.834655	0.560717	1.78343
A49	22.2528	24.7267	-2.47393	-2.02186	-0.452068	0.730994	1.368
A50	22.0202	25.0979	-3.07775	-2.02186	-1.05589	0.481	2.079
B1	22.6264	24.9717	-2.34529	-2.02186	-0.323428	0.799169	1.2513
B2	22.5578	25.5983	-3.04049	-2.02186	-1.01863	0.493583	2.026
B3	33.0256	35.4546	-2.42894	-2.02186	-0.407081	0.754148	1.326
B4	32.1369	35.2754	-3.13855	-2.02186	-1.11669	0.46115	2.16849
B5	32.4611	35.749	-3.2879	-2.02186	-1.26604	0.4158	2.405
B6	21.302	24.3104	-3.00831	-2.02186	-0.986447	0.504719	1.9813
B7	20.543	23.8932	-3.35024	-2.02186	-1.32838	0.398216	2.5112
B8	20.8937	24.5981	-3.70434	-2.02186	-1.68248	0.311546	3.2098
B9	31.8352	35.2953	-3.46009	-2.02186	-1.43823	0.369019	2.70989
B10	32.7006	35.302	-2.60143	-2.02186	-0.579566	0.669165	1.4944
B11	31.9779	35.0694	-3.09149	-2.02186	-1.06963	0.47644	2.0989
B12	21.5073	24.4688	-2.96146	-2.02186	-0.939603	0.521376	1.918
B13	21.2368	24.9749	-3.73819	-2.02186	-1.71633	0.304321	3.286
B14	21.4604	25.2942	-3.83382	-2.02186	-1.81196	0.284803	3.5112
B15	31.0957	35.4156	-4.31993	-2.02186	-2.29807	0.203335	4.918
B16	31.4712	35.4945	-4.02334	-2.02186	-2.00148	0.249744	4.0041
B17	32.7348	36.5325	-3.79771	-2.02186	-1.77585	0.292022	3.4244
B18	21.6409	24.8755	-3.23457	-2.02186	-1.21271	0.431457	2.31773
B19	22.4122	25.1704	-2.75825	-2.02186	-0.736388	0.60024	1.666
B20	20.646	24.8851	-4.23909	-2.02186	-2.21723	0.215054	4.65
B21	29.6735	33.5898	-3.91639	-2.02186	-1.89453	0.268962	3.718
B22	29.971	33.9534	-3.98241	-2.02186	-1.96055	0.256931	3.8921
B23	30.1794	34.1093	-3.92986	-2.02186	-1.90801	0.266461	3.7529
B24	20.7731	24.3152	-3.54205	-2.02186	-1.5202	0.348639	2.8683
B25	19.9282	24.1651	-4.23692	-2.02186	-2.21506	0.215378	4.643
B26	19.6788	23.7855	-4.10669	-2.02186	-2.08483	0.235724	4.24225
B27	26.6928	31.0542	-4.36139	-2.02186	-2.33953	0.197575	5.06137
B28	26.9182	31.1698	-4.2516	-2.02186	-2.22974	0.213197	4.6905
B29	27.7107	29.9127	-2.20201	-2.02186	-0.180148	0.882613	1.133
B30	20.3843	24.0238	-3.63953	-2.02186	-1.61767	0.32586	3.0688
B31	19.0383	22.6106	-3.57227	-2.02186	-1.55041	0.341413	2.929
B32	20.4288	23.4995	-3.07065	-2.02186	-1.04879	0.483372	2.0688
B33	28.1259	31.4745	-3.34857	-2.02186	-1.32671	0.398676	2.5083
B34	26.8859	30.5439	-3.65798	-2.02186	-1.63613	0.321719	3.1083
B35	26.6884	30.3661	-3.67772	-2.02186	-1.65586	0.317347	3.15112
B36	21.177	24.7098	-3.53282	-2.02186	-1.51096	0.350877	2.85
B37	19.797	23.3963	-3.5993	-2.02186	-1.57744	0.335076	2.9844
B38	20.1148	23.6229	-3.50811	-2.02186	-1.48625	0.356939	2.8016
B39	28.4359	31.4878	-3.05184	-2.02186	-1.02998	0.489716	2.042
B40	27.8257	30.8367	-3.011	-2.02186	-0.989139	0.503778	1.985
B41	26.1237	30.2077	-4.08398	-2.02186	-2.06212	0.239464	4.176
B42	22.1325	26.3818	-4.24929	-2.02186	-2.22743	0.213538	4.683
B43	23.6091	27.2346	-3.62546	-2.02186	-1.6036	0.329056	3.039
B44	23.0186	26.9517	-3.93312	-2.02186	-1.91126	0.265861	3.76137
B45	27.0035	31.0715	-4.06798	-2.02186	-2.04612	0.242134	4.12994
B46	27.5756	31.6389	-4.06324	-2.02186	-2.04138	0.242931	4.1164
B47	27.0648	31.3997	-4.33483	-2.02186	-2.31297	0.201246	4.96905
B48	19.9506	24.341	-4.39038	-2.02186	-2.36852	0.193645	5.1641
B49	21.8196	24.9343	-3.11474	-2.02186	-1.09288	0.468823	2.133
B50	22.1414	25.3811	-3.23971	-2.02186	-1.21785	0.429923	2.326
B51	22.1075	24.882	-2.77452	-2.02186	-0.752663	0.593507	1.6849
B52	21.8581	24.9485	-3.09039	-2.02186	-1.06853	0.476804	2.0973
B53	22.7496	25.9422	-3.19262	-2.02186	-1.17076	0.444188	2.2513
B54	28.1637	31.1334	-2.96971	-2.02186	-0.947853	0.518403	1.929
B55	27.553	31.2574	-3.70434	-2.02186	-1.68248	0.311546	3.2098
B56	27.6587	31.6708	-4.01209	-2.02186	-1.99023	0.251699	3.973
B57	24.2434	28.0329	-3.78951	-2.02186	-1.76765	0.293686	3.405
B58	23.488	27.5031	-4.0151	-2.02186	-1.99324	0.251174	3.9813
B59	23.3569	27.4669	-4.10997	-2.02186	-2.08811	0.235189	4.2519
B60	28.336	31.4796	-3.14354	-2.02186	-1.12168	0.459559	2.176
B61	28.2046	32.0916	-3.88703	-2.02186	-1.86517	0.274492	3.6431
B62	27.8352	32.0743	-4.23909	-2.02186	-2.21723	0.215054	4.65
B63	20.2549	23.8349	-3.58007	-2.02186	-1.55821	0.339572	2.94488
B64	20.1071	23.7409	-3.63378	-2.02186	-1.61192	0.327163	3.05658
B65	19.4667	23.1711	-3.70443	-2.02186	-1.68257	0.311526	3.21
B66	27.3253	31.5799	-4.25465	-2.02186	-2.23279	0.212747	4.70041
B67	28.0357	31.5001	-3.4644	-2.02186	-1.44255	0.367918	2.718
B68	28.7746	31.8382	-3.06366	-2.02186	-1.0418	0.48572	2.0588
B69	17.8584	21.849	-3.99065	-2.02186	-1.96879	0.255467	3.9144
B70	17.9579	22.1274	-4.16949	-2.02186	-2.14763	0.225683	4.431
B71	17.9646	22.0861	-4.12149	-2.02186	-2.09963	0.233318	4.286
B72	20.426	23.6964	-3.27033	-2.02186	-1.24847	0.420893	2.3759
B73	18.4293	22.1813	-3.75206	-2.02186	-1.7302	0.301411	3.31773
B74	19.3974	23.1866	-3.78917	-2.02186	-1.76732	0.293755	3.4042
B75	26.8508	30.6659	-3.81505	-2.02186	-1.79319	0.288534	3.4658
B76	27.1474	31.4189	-4.27143	-2.02186	-2.24957	0.210287	4.7554
B77	25.7331	29.6816	-3.94847	-2.02186	-1.92661	0.263047	3.8016
B78	19.6714	23.5125	-3.84112	-2.02186	-1.81926	0.283366	3.529
B79	18.2998	22.3631	-4.06324	-2.02186	-2.04138	0.242931	4.1164
B80	19.1414	23.6368	-4.49539	-2.02186	-2.47353	0.18005	5.554
B81	25.9309	30.0823	-4.15144	-2.02186	-2.12958	0.228524	4.3759
B82	26.5563	30.4747	-3.91841	-2.02186	-1.89655	0.268584	3.72323
B83	27.7201	31.4433	-3.72314	-2.02186	-1.70128	0.307513	3.2519
B84	18.7491	21.7195	-2.97041	-2.02186	-0.948556	0.518151	1.92994
B85	17.8878	21.9236	-4.03586	-2.02186	-2.014	0.247586	4.039
B86	19.0208	22.955	-3.93424	-2.02186	-1.91238	0.265654	3.7643
B87	27.9618	32.0651	-4.1033	-2.02186	-2.08144	0.236278	4.2323
B88	27.2017	31.7195	-4.51781	-2.02186	-2.49595	0.177274	5.641
B89	26.0658	30.1725	-4.10669	-2.02186	-2.08483	0.235724	4.24225
C1	17.8686	21.9561	-4.08748	-2.02186	-2.06562	0.238884	4.18614
C2	18.6024	22.9725	-4.37017	-2.02186	-2.34831	0.196376	5.09228
C3	17.945	22.0655	-4.12048	-2.02186	-2.09862	0.233481	4.283
C4	26.6564	30.7298	-4.07337	-2.02186	-2.05151	0.241231	4.1454
C5	27.2477	31.5026	-4.25484	-2.02186	-2.23298	0.212719	4.70103
C6	27.0003	31.5887	-4.58845	-2.02186	-2.5666	0.168802	5.9241
C7	17.3967	21.0841	-3.68747	-2.02186	-1.66561	0.315212	3.17247
C8	17.2855	21.7418	-4.45629	-2.02186	-2.43444	0.184996	5.40553
C9	16.87	21.3318	-4.46175	-2.02186	-2.43989	0.184298	5.426
C10	16.8237	20.9919	-4.16819	-2.02186	-2.14633	0.225887	4.427
C11	16.4382	20.6549	-4.2167	-2.02186	-2.19484	0.218417	4.57839
C12	16.1898	20.4214	-4.23159	-2.02186	-2.20973	0.216174	4.6259
C13	27.0056	31.033	-4.0274	-2.02186	-2.00554	0.249041	4.0154
C14	27.6164	31.888	-4.27161	-2.02186	-2.24975	0.210261	4.756
C15	28.2756	32.696	-4.42046	-2.02186	-2.3986	0.189649	5.2729
C16	27.7463	32.1154	-4.36914	-2.02186	-2.34728	0.196517	5.08863
C17	28.3724	32.361	-3.98857	-2.02186	-1.96671	0.255836	3.90876
C18	28.3388	32.8511	-4.51235	-2.02186	-2.49049	0.177946	5.61969
C19	16.6196	21.039	-4.41939	-2.02186	-2.39753	0.189789	5.269
C20	16.3041	20.7543	-4.45027	-2.02186	-2.42841	0.18577	5.383
C21	16.2386	20.6536	-4.415	-2.02186	-2.39314	0.190367	5.253
C22	22.0508	26.2584	-4.20766	-2.02186	-2.1858	0.21979	4.54979
C23	23.7375	27.958	-4.22056	-2.02186	-2.1987	0.217834	4.59065
C24	24.81	28.6828	-3.87274	-2.02186	-1.85088	0.277223	3.6072
C25	26.5502	30.6018	-4.05165	-2.02186	-2.02979	0.244891	4.08345
C26	26.7043	30.968	-4.2637	-2.02186	-2.24184	0.211416	4.73
C27	28.1583	32.5917	-4.43335	-2.02186	-2.41149	0.187961	5.32025
C28	28.3886	32.6177	-4.22919	-2.02186	-2.20733	0.216535	4.6182
C29	28.5768	32.7071	-4.13032	-2.02186	-2.10846	0.231894	4.31231
C30	28.6974	32.5323	-3.83481	-2.02186	-1.81295	0.284608	3.5136
C31	22.0657	26.4851	-4.41939	-2.02186	-2.39753	0.189789	5.269
C32	21.7859	26.5305	-4.74454	-2.02186	-2.72268	0.151492	6.601
C33	22.0712	26.8355	-4.7643	-2.02186	-2.74244	0.149432	6.692
C34	23.348	27.2114	-3.86343	-2.02186	-1.84157	0.279018	3.584
C35	23.4716	27.3786	-3.90704	-2.02186	-1.88518	0.270709	3.694
C36	22.896	27.9229	-5.0269	-2.02186	-3.00504	0.124564	8.028
C37	27.7992	32.1159	-4.3167	-2.02186	-2.29484	0.203791	4.907
C38	27.1494	31.8478	-4.69835	-2.02186	-2.67649	0.156421	6.393
C39	28.3514	32.0932	-3.74187	-2.02186	-1.72002	0.303545	3.2944
C40	24.895	29.2481	-4.35306	-2.02186	-2.3312	0.198719	5.03223
C41	25.0806	29.4629	-4.38234	-2.02186	-2.36048	0.194726	5.13541
C42	26.075	30.1942	-4.11917	-2.02186	-2.09731	0.233694	4.2791
C43	25.7977	29.9406	-4.14287	-2.02186	-2.12102	0.229885	4.35
C44	24.7346	29.9787	-5.24405	-2.02186	-3.22219	0.107158	9.332
