# Supplementary material for: Expression level and clinical significance of LncRNA PVT1 in the serum of patients with LEASO
Source: PeerJ. 2023 Sep 19;11:e16057. doi: 10.7717/peerj.16057 (PMC10516103; doi:10.7717/peerj.16057)
Supplement: Supplemental Information 2 [file peerj-11-16057-s002.xlsx]

## Sheet: CAD+LEASO
group=3	gender（1=male，0=female）	year（Y）	rutherford	left0、right1、double2	hypertension（1=Y，0=N）	TDM（1=Y，0=N）	CAD	smoke（1=Y，0=N）	wine（1=Y，0=N）	BMI（kg/m²）	weight	high	high²	Apo a 【1.00-1.60】	Apo b【0.6-1.1】	Lpa【0-30】	BUN mmol/L【3.1-8】	Cr umol/L【57-111】	UA umol/L【208-428】	TBIL	DBIL	IBIL	PVT1
3	0	85	0	2	0	0	1	0	1	22.5981	70	1.76	3.0976	1.4	0.73	31.64	7.11	96.96	141.12	13.5	3.5	10	4.19
3	0	80	0	0	1	0	1	0	0	27.3437	70	1.6	2.56	1.24	0.69	6.29	7.15	69.8	360.33	15.3	3.5	11.8	5.09
3	0	76	0	2	0	0	1	0	0	30.4832	80	1.62	2.6244	1.03	1.15	38.59	5.48	56.4	349.64	18.3	4.2	14.1	4.28
3	0	68	0	2	0	0	1	0	0	20.8117	50	1.55	2.4025	1.39	1.47	26.71	4.56	47.41	245.46	12.4	1.9	10.5	4.15
3	0	86	0	2	1	1	1	0	0	25.0657	61	1.56	2.4336	1.05	1.18	4.39	7.38	62.03	413.4	10.9	2.3	8.6	4.7
3	1	63	1	0	1	1	1	1	1	25.9516	75	1.7	2.89	1.59	1.07	14.12	7.92	69.4	403.73	10.1	2.03	8.07	5.92
3	0	58	1	2	1	1	1	0	0	26.4381	66	1.58	2.4964	1.45	0.83	57.98	10.42	102.3	472.46	4.5	1.03	3.47	3.17
3	1	63	1	2	0	0	1	1	0	21.6441	52	1.55	2.4025	1.26	1.33	82.66	4.67	61.13	304.56	14.1	2.4	11.7	5.41
3	1	69	1	2	1	0	1	1	1	24.1517	80	1.82	3.3124	1.19	1.03	12.31	5.38	68.58	389.28	8.2	1.8	6.4	5.43
3	0	80	1	1	1	1	1	0	0	18.8189	50	1.63	2.6569	1.24	1.04	39.89	7.93	73.22	266.29	22.6	4.17	18.33	4.43
3	1	59	2	2	1	1	1	1	1	22.4913	65	1.7	2.89	1.43	1.13	28.52	2.29	52	171.44	12.7	3	9.7	4.58
3	1	66	2	0	0	0	1	1	1	26.1224	80	1.75	3.0625	1.39	1.09	38.34	4.83	63	391.44	15.1	2.15	12.95	4.63
3	1	67	3	2	0	1	1	1	0	26.2976	76	1.7	2.89	1.03	1.15	9.19	6.92	71.1	427.89	6	1.1	4.9	4.02
3	0	66	3	2	1	0	1	0	0	27.3437	70	1.6	2.56	1.24	0.67	13.48	4.99	120.2	128.98	9	1.82	7.18	4.76
3	1	76	3	0	1	1	1	0	0	23.9395	75	1.77	3.1329	1.16	1.14	2.97	10.04	85.9	328.5	7.6	1.53	6.07	5.27
3	1	74	3	1	1	1	1	0	1	23.5883	65	1.66	2.7556	0.95	0.95	14.25	7.48	62.1	289.37	15	3	12	5.09
3	1	79	3	0	1	0	1	0	0	29.4029	88	1.73	2.9929	1.11	1.2	16.25	7.56	81.3	521.52	12.4	2.2	10.2	3.91
3	1	81	3	1	1	0	1	1	1	23.5294	68	1.7	2.89	1.29	0.5	21.77	5.74	79.22	264.93	13.9	3.4	10.5	5.62
3	1	76	3	2	0	0	1	0	0	26.5625	68	1.6	2.56	0.91	0.78	16.08	9.19	59.96	299.96	9.1	2.2	6.9	5.27
3	1	83	3	0	1	1	1	1	0	23.03	65	1.68	2.8224	1.39	0.71	44.05	5.53	103.22	471.98	12.5	2.99	9.51	5.38
3	1	92	3	2	0	0	1	0	0	23.8754	69	1.7	2.89	1.2	0.68	21.57	10.7	104.56	464.28	13.2	3.3	9.9	5.25
3	0	78	3	2	1	1	1	0	0	24.6548	60	1.56	2.4336	1.61	1.01	68.5	5.53	54.97	229.62	12.6	2.8	9.8	4.55
3	0	72	3	2	1	1	1	0	0	22.0386	60	1.65	2.7225	1.33	0.82	32.69	5.47	66.06	459.89	16.6	4.2	12.4	4.59
3	0	78	3	2	1	1	1	0	0	26.2596	75	1.69	2.8561	1.3	0.69	7.2	7.06	84.58	484.96	15.1	3.1	12	3.61
3	0	85	3	2	1	1	1	0	0	23.0469	59	1.6	2.56	1.36	0.95	8.56	5.72	60.89	217.76	9.8	2.1	7.7	4.08
3	1	68	4	0	1	1	1	1	0	28.7037	93	1.8	3.24	0.87	0.45	59.39	7.43	77.9	367.37	11.1	2.98	8.12	4.73
3	0	86	4	0	1	1	1	0	0	22.0386	60	1.65	2.7225	1.18	0.68	41.92	7.52	54.7	415.83	8.7	1.99	6.71	5.32
3	1	62	4	2	1	0	1	1	0	27.6817	80	1.7	2.89	1.13	1.34	7.58	5.53	66.4	462.14	8.3	1.32	6.98	4.62
3	0	81	4	1	0	1	1	0	0	20.202	55	1.65	2.7225	1.36	0.72	34.83	5.36	66.76	127.3	8.3	1.9	6.4	4.31
3	0	76	4	0	1	0	1	0	0	28.6851	80	1.67	2.7889	1.41	1.29	10.91	7.53	78.57	370.48	14	2.6	11.4	3.51
3	0	60	4	2	1	1	1	0	0	22.5827	60	1.63	2.6569	0.95	0.64	161.06	15.65	229.72	372.32	5.9	0.66	5.24	5.27
3	1	66	4	2	1	1	1	1	0	22.1443	62.5	1.68	2.8224	1.22	1.22	109.64	5.53	63	286.22	10.7	2.2	8.5	6.6
3	0	79	4	2	1	1	1	0	0	26.2222	59	1.5	2.25	1.17	0.88	138.51	5.84	71.76	347.61	8.2	1.3	6.9	6.69
3	0	68	4	2	1	1	1	1	1	23.6244	62	1.62	2.6244	0.97	1.3	37.28	13.06	743.58	314.74	14	2.3	11.7	3.58
3	1	78	4	1	1	0	1	0	0	19.2653	59	1.75	3.0625	0.99	1.34	30.91	5.23	52.61	281.82	21.2	4.7	16.5	3.69
3	0	87	4	1	0	0	1	0	0	21.4844	55	1.6	2.56	1.55	0.76	7.52	9.29	90.71	324.7	8.1	1.6	6.5	8.03
3	1	63	5	1	1	0	1	0	0	22.5827	60	1.63	2.6569	1.28	0.92	130.24	11.83	121.1	658.25	8.7	1.8	6.9	4.91
3	1	59	5	2	0	1	1	1	0	25.9516	75	1.7	2.89	0.86	1.06	36.1	5.44	85.3	288.01	7	1.6	5.4	6.39
3	1	97	5	1	1	0	1	0	0	20.202	55	1.65	2.7225	0.95	0.58	4.11	10.22	138.42	499.88	13.8	3.5	10.3	3.29
3	1	92	5	0	1	1	1	0	0	22.7583	65	1.69	2.8561	0.99	0.97	7.23	9.17	80.62	404.79	19.5	3.1	16.4	5.03
3	0	76	6	2	1	0	1	0	0	25.3906	65	1.6	2.56	0.85	0.69	32.07	4.27	77.18	454.31	6.2	1.1	5.1	5.14
3	1	66	6	0	1	1	1	0	0	25.4694	78	1.75	3.0625	1.34	0.74	32.03	7.22	108.69	545.27	14.5	2.9	11.6	4.28
3	1	80	6	1	1	1	1	0	0	22.0932	70	1.78	3.1684	1.11	1.32	95.33	9.32	77.87	283.13	23.3	5.8	17.5	4.35
3	0	76	6	0	1	0	1	1	0	19.1406	49	1.6	2.56	1.23	1.29	30.96	5.19	62.78	203.31	7.6	1.2	6.4	9.33

## Sheet: control
group=1	gender（1=male，0=female）	year（Y）	rutherford	left0、right1、double2	hypertension（1=Y，0=N）	TDM（1=Y，0=N）	CAD	smoke（1=Y，0=N）	wine（1=Y，0=N）	BMI（kg/m²）	weight	high	high²	Apo a 【1.00-1.60】	Apo b【0.6-1.1】	Lpa【0-30】	BUN mmol/L【3.1-8】	Cr umol/L【57-111】	UA umol/L【208-428】	TBIL	DBIL	IBIL	PVT1
1	1	64	0	0	1	0	0	1	1	17.7154	50	1.68	2.8224	1.51	1.26	48.52	3.86	61.23	234.24	11.5	2.1	9.4	0.63
1	1	64	0	0	1	0	0	1	1	17.7154	50	1.68	2.8224	1.51	1.26	48.52	3.86	61.23	234.24	11.5	2.1	9.4	1.21
1	1	59	0	1	0	1	0	1	0	21.2953	63	1.72	2.9584	1.16	1.09	49.34	3.77	49.55	246.91	18.7	2.6	16.1	1.14
1	1	77	0	2	0	0	0	0	0	23.5294	68	1.7	2.89	1.12	1.16	18.44	8.89	105.51	435.51	15.9	3.3	12.6	1.03
1	1	52	1	0	0	0	0	1	1	26.8136	73	1.65	2.7225	1.28	1.13	8.76	6.15	60.05	239.28	14.7	3	11.7	0.96
1	0	77	1	0	1	0	0	0	0	22.1893	54	1.56	2.4336	1.28	0.89	98.93	4.55	65.84	387.54	9.7	1.9	7.8	2.23
1	1	74	1	1	0	0	0	0	0	23.4375	60	1.6	2.56	1.28	0.7	12.74	6.4	78.16	256.74	9.5	2.4	7.1	1.91
1	1	94	1	2	0	0	0	0	0	20.202	55	1.65	2.7225	1.38	0.6	1.08	3.8	55.8	188.52	15.5	4.68	10.82	0.94
1	1	69	2	0	1	0	0	1	1	24.3375	72	1.72	2.9584	1.29	0.85	5.22	5.89	79.45	279.6	8.3	2	6.3	3.96
1																							2.14
1	1	70	2	1	1	1	0	1	1	20.5151	65	1.78	3.1684	1.2	1.57	18.21	2.9	82.66	430.39	18	3.2	14.8	2.46
1	1	66	2	1	1	0	0	1	0	26.8923	75	1.67	2.7889	0.86	1.24	22.59	5.53	60.48	312.87	7.5	1.49	6.01	3.98
1																							1.04
1	1	65	2	1	0	1	0	1	1	18.3058	58	1.78	3.1684	1.47	0.9	52.22	10.09	101.89	383.03	9.2	1.8	7.4	1.29
1	1	66	3	0	1	1	0	0	0	30.8642	100	1.8	3.24	1.28	0.94	5.8	8.77	97.5	288.23	18.4	4.1	14.3	1.02
1	1	65	3	0	1	0	0	1	1	29.3848	80	1.65	2.7225	1.29	2.43	18.92	4.79	74.13	442.05	12.3	2.6	9.7	0.92
1	1	73	3	0	0	0	0	1	1	22.2041	68	1.75	3.0625	1.5	1.15	10.53	6.37	73.29	479.81	11.8	2.1	9.7	2.7
1	1	56	3	0	1	0	0	0	0	29.4118	85	1.7	2.89	0.93	0.92	46.15	6.24	90.2	410.67	9.9	1.95	7.95	1.4
1	0	68	3	0	0	1	0	0	0	25.3906	65	1.6	2.56	1.26	1.17	5.23	3.69	46.64	282.62	10	2.11	7.89	1.49
1	1	81	3	0	0	0	0	0	0	19.6927	61	1.76	3.0976	1.02	0.78	9.69	3.25	65	285.35	11.7	2.53	9.17	0.92
1	0	65	3	0	0	1	0	0	0	20.1348	49	1.56	2.4336	1.17	0.59	18.3	5.73	52.39	201.13	9.9	1.6	8.3	0.3
1	1	65	3	0	1	0	0	0	0	20.4783	62	1.74	3.0276	0.96	1.03	27.43	6.45	69.27	365.78	8.5	1.49	7.01	1.81
1																							1.04
1	0	79	3	1	1	1	0	0	0	25.3906	65	1.6	2.56	1.29	1.57	31.56	4.43	63.4	176.78	20.6	4.6	16	1.89
1	1	80	3	1	0	0	0	1	1	23.1834	67	1.7	2.89	0.88	1.03	8.3	7.33	85.36	333.65	20.8	3.6	17.2	2.82
1	1	63	3	1	0	1	0	0	0	27.7743	88	1.78	3.1684	1.38	1.39	5.78	8.3	60.62	445.24	14.4	3.1	11.3	1.65
1	0	58	3	1	0	0	0	0	0	25.3906	65	1.6	2.56	1.06	1.09	6.88	5.23	57.3	316.85	7.6	1.7	5.9	1.43
1	1	60	3	2	1	0	0	1	0	19.8413	56	1.68	2.8224	0.93	1.18	12	7.47	88.9	381.32	17.1	3.73	13.37	1.61
1																							0.97
1	1	67	3	2	0	0	0	1	0	15.0204	46	1.75	3.0625	1.33	0.8	39.15	4.61	60.5	237.16	12.2	2.53	9.67	1.21
1	1	71	3	2	0	0	0	0	0	26.6749	78	1.71	2.9241	0.91	1.01	39.67	4.64	80.67	420.64	8.5	1.4	7.1	0.95
1	1	65	3	2	1	1	0	0	0	28.0557	83	1.72	2.9584	1.35	0.65	16.03	8.47	90.11	336.89	34.7	6.1	28.6	1.01
1	1	64	3	2	0	1	0	0	1	26.1962	83	1.78	3.1684	1.33	1.3	5.41	7.59	66.48	325.34	15	4.6	10.4	0.9
1	1	71	3	2	1	0	0	0	0	23.8754	69	1.7	2.89	1.44	0.91	16.51	5.33	76.48	264.63	11.1	2.3	8.8	1.41
1	1	80	3	2	1	1	0	0	0	23.6713	75	1.78	3.1684	1.55	0.74	18.3	5.28	71.58	343.37	7.2	1.6	5.6	1.7
1	1	66	3	2	1	0	0	1	1	30.7958	89	1.7	2.89	1.5	1.13	5.8	4.43	69.54	326.33	8.2	1.7	6.5	3.22
1																							2.73
1	0	86	3	2	1	1	0	0	0	22.3081	60	1.64	2.6896	1.18	0.77	20.97	5.59	50.49	167.53	8.7	1.7	7	1.7
1	0	69	4	0	1	1	0	0	0	27.6817	80	1.7	2.89	1.58	1.19	22.04	7.89	45.6	277.47	8.2	1.45	6.75	1.09
1	1	74	4	0	1	0	0	1	1	22.0386	60	1.65	2.7225	1.14	0.83	110.66	6.44	79.9	337.03	10.9	2.4	8.5	1.43
1	0	73	4	2	0	0	0	0	0	27.3437	70	1.6	2.56	1.09	1.55	48.59	5.32	61.8	398.58	11.1	1.24	9.86	0.68
1	1	87	4	2	1	0	0	0	0	28.699	81	1.68	2.8224	1.02	1.05	33.48	4.01	60.6	268.91	21.2	5	16.2	0.98
1	1	74	4	2	1	1	0	0	0	27.3437	70	1.6	2.56	0.9	1.29	198.12	3.32	66.5	171.24	8.6	1.45	7.15	2.95
1	0	72	4	2	1	0	0	0	0	30.8463	85	1.66	2.7556	1.21	1.08	7.82	5.17	65.61	350.16	14.4	3.2	11.2	1.2
1	0	74	4	2	0	0	0	0	0	27.6888	70	1.59	2.5281	1.05	1.17	56.4	4.65	59.7	368.82	12.5	2.7	9.8	1.4
1	1	78	4	2	0	1	0	1	0	29.2969	75	1.6	2.56	0.9	1.4	79.39	10.41	104.62	544.68	8.7	1.2	7.5	0.59
1	1	66	5	0	0	1	0	0	1	18.8272	61	1.8	3.24	0.63	1.29	154.28	4.49	57.4	356.04	12	3.48	8.52	1.06
1	1	69	5	1	0	1	0	1	0	24.9135	72	1.7	2.89	1.12	0.85	104.64	7.51	73.65	319.88	11.9	2.4	9.5	1.78
1	1	82	6	1	1	1	0	0	0	23.4375	60	1.6	2.56	0.83	0.74	114.58	7.83	69.44	436.7	10.6	2.5	8.1	1.37
1	0	72	6	2	1	0	0	0	0	21.4844	55	1.6	2.56	1.4	0.59	138.73	7.47	103.62	358.35	6.8	1.4	5.4	2.08

## Sheet: LEASO
group=2	gender（1=male，0=female）	year（Y）	rutherford	left0、right1、double2	hypertension（1=Y，0=N）	TDM（1=Y，0=N）	CAD	smoke（1=Y，0=N）	wine（1=Y，0=N）	BMI（kg/m²）	weight	high	high²	Apo a 【1.00-1.60】	Apo b【0.6-1.1】	Lpa【0-30】	BUN mmol/L【3.1-8】	Cr umol/L【57-111】	UA umol/L【208-428】	TBIL	DBIL	IBIL	PVT1
2	0	80	0	0	1	0	1	0	0	27.3437	70	1.6	2.56	1.24	0.69	6.29	7.15	69.8	360.33	15.3	3.5	11.8	1.25
2	1	64	0	0	1	0	0	1	1	17.7154	50	1.68	2.8224	1.51	1.26	48.52	3.86	61.23	234.24	11.5	2.1	9.4	2.03
2	1	64	0	0	1	0	0	1	1	17.7154	50	1.68	2.8224	1.51	1.26	48.52	3.86	61.23	234.24	11.5	2.1	9.4	1.33
2	1	59	0	1	0	1	0	1	0	21.2953	63	1.72	2.9584	1.16	1.09	49.34	3.77	49.55	246.91	18.7	2.6	16.1	1.13
2	0	76	0	2	0	0	1	0	0	30.4832	80	1.62	2.6244	1.03	1.15	38.59	5.48	56.4	349.64	18.3	4.2	14.1	2.17
2	0	85	0	2	0	0	1	0	1	22.5981	70	1.76	3.0976	1.4	0.73	31.64	7.11	96.96	141.12	13.5	3.5	10	2.41
2	0	68	0	2	0	0	1	0	0	20.8117	50	1.55	2.4025	1.39	1.47	26.71	4.56	47.41	245.46	12.4	1.9	10.5	1.98
2	0	86	0	2	1	1	1	0	0	25.0657	61	1.56	2.4336	1.05	1.18	4.39	7.38	62.03	413.4	10.9	2.3	8.6	3.07
2	1	77	0	2	0	0	0	0	0	23.5294	68	1.7	2.89	1.12	1.16	18.44	8.89	105.51	435.51	15.9	3.3	12.6	2.93
2	1	52	1	0	0	0	0	1	1	26.8136	73	1.65	2.7225	1.28	1.13	8.76	6.15	60.05	239.28	14.7	3	11.7	2.07
2	1	63	1	0	1	1	1	1	1	25.9516	75	1.7	2.89	1.59	1.07	14.12	7.92	69.4	403.73	10.1	2.03	8.07	2.51
2	0	77	1	0	1	0	0	0	0	22.1893	54	1.56	2.4336	1.28	0.89	98.93	4.55	65.84	387.54	9.7	1.9	7.8	2.51
2	0	80	1	1	1	1	1	0	0	18.8189	50	1.63	2.6569	1.24	1.04	39.89	7.93	73.22	266.29	22.6	4.17	18.33	3.11
2	1	74	1	1	0	0	0	0	0	23.4375	60	1.6	2.56	1.28	0.7	12.74	6.4	78.16	256.74	9.5	2.4	7.1	3.21
2	0	58	1	2	1	1	1	0	0	26.4381	66	1.58	2.4964	1.45	0.83	57.98	10.42	102.3	472.46	4.5	1.03	3.47	2.71
2	1	63	1	2	0	0	1	1	0	21.6441	52	1.55	2.4025	1.26	1.33	82.66	4.67	61.13	304.56	14.1	2.4	11.7	3.15
2	1	69	1	2	1	0	1	1	1	24.1517	80	1.82	3.3124	1.19	1.03	12.31	5.38	68.58	389.28	8.2	1.8	6.4	2.85
2	1	94	1	2	0	0	0	0	0	20.202	55	1.65	2.7225	1.38	0.6	1.08	3.8	55.8	188.52	15.5	4.68	10.82	1.49
2	1	66	2	0	0	0	1	1	1	26.1224	80	1.75	3.0625	1.39	1.09	38.34	4.83	63	391.44	15.1	2.15	12.95	2.1
2	1	69	2	0	1	0	0	1	1	24.3375	72	1.72	2.9584	1.29	0.85	5.22	5.89	79.45	279.6	8.3	2	6.3	1.92
2	1	66	2	1	1	0	0	1	0	26.8923	75	1.67	2.7889	0.86	1.24	22.59	5.53	60.48	312.87	7.5	1.49	6.01	3.29
2	1	70	2	1	1	1	0	1	1	20.5151	65	1.78	3.1684	1.2	1.57	18.21	2.9	82.66	430.39	18	3.2	14.8	2.98
2	1	65	2	1	0	1	0	1	1	18.3058	58	1.78	3.1684	1.47	0.9	52.22	10.09	101.89	383.03	9.2	1.8	7.4	3.51
2	1	59	2	2	1	1	1	1	1	22.4913	65	1.7	2.89	1.43	1.13	28.52	2.29	52	171.44	12.7	3	9.7	4.92
2	1	65	3	0	1	0	0	0	0	20.4783	62	1.74	3.0276	0.96	1.03	27.43	6.45	69.27	365.78	8.5	1.49	7.01	4
2	1	83	3	0	1	1	1	1	0	23.03	65	1.68	2.8224	1.39	0.71	44.05	5.53	103.22	471.98	12.5	2.99	9.51	3.42
2	1	65	3	0	1	0	0	1	1	29.3848	80	1.65	2.7225	1.29	2.43	18.92	4.79	74.13	442.05	12.3	2.6	9.7	2.32
2	1	76	3	0	1	1	1	0	0	23.9395	75	1.77	3.1329	1.16	1.14	2.97	10.04	85.9	328.5	7.6	1.53	6.07	2.8
2	0	68	3	0	0	1	0	0	0	25.3906	65	1.6	2.56	1.26	1.17	5.23	3.69	46.64	282.62	10	2.11	7.89	1.67
2	1	66	3	0	1	1	0	0	0	30.8642	100	1.8	3.24	1.28	0.94	5.8	8.77	97.5	288.23	18.4	4.1	14.3	2.04
2	1	73	3	0	0	0	0	1	1	22.2041	68	1.75	3.0625	1.5	1.15	10.53	6.37	73.29	479.81	11.8	2.1	9.7	1.99
2	1	56	3	0	1	0	0	0	0	29.4118	85	1.7	2.89	0.93	0.92	46.15	6.24	90.2	410.67	9.9	1.95	7.95	4.65
2	0	65	3	0	0	1	0	0	0	20.1348	49	1.56	2.4336	1.17	0.59	18.3	5.73	52.39	201.13	9.9	1.6	8.3	3.72
2	1	81	3	0	0	0	0	0	0	19.6927	61	1.76	3.0976	1.02	0.78	9.69	3.25	65	285.35	11.7	2.53	9.17	3.89
2	1	79	3	0	1	0	1	0	0	29.4029	88	1.73	2.9929	1.11	1.2	16.25	7.56	81.3	521.52	12.4	2.2	10.2	4.18
2	1	80	3	1	0	0	0	1	1	23.1834	67	1.7	2.89	0.88	1.03	8.3	7.33	85.36	333.65	20.8	3.6	17.2	4.68
2	1	63	3	1	0	1	0	0	0	27.7743	88	1.78	3.1684	1.38	1.39	5.78	8.3	60.62	445.24	14.4	3.1	11.3	3.04
2	1	81	3	1	1	0	1	1	1	23.5294	68	1.7	2.89	1.29	0.5	21.77	5.74	79.22	264.93	13.9	3.4	10.5	3.75
2	1	74	3	1	1	1	1	0	1	23.5883	65	1.66	2.7556	0.95	0.95	14.25	7.48	62.1	289.37	15	3	12	2.87
2	0	58	3	1	0	0	0	0	0	25.3906	65	1.6	2.56	1.06	1.09	6.88	5.23	57.3	316.85	7.6	1.7	5.9	4.64
2	0	79	3	1	1	1	0	0	0	25.3906	65	1.6	2.56	1.29	1.57	31.56	4.43	63.4	176.78	20.6	4.6	16	3.76
2	1	66	3	2	1	0	0	1	1	30.7958	89	1.7	2.89	1.5	1.13	5.8	4.43	69.54	326.33	8.2	1.7	6.5	4.13
2	1	71	3	2	1	0	0	0	0	23.8754	69	1.7	2.89	1.44	0.91	16.51	5.33	76.48	264.63	11.1	2.3	8.8	4.24
2	1	67	3	2	0	1	1	1	0	26.2976	76	1.7	2.89	1.03	1.15	9.19	6.92	71.1	427.89	6	1.1	4.9	4.12
2	1	71	3	2	0	0	0	0	0	26.6749	78	1.71	2.9241	0.91	1.01	39.67	4.64	80.67	420.64	8.5	1.4	7.1	4.97
2	1	60	3	2	1	0	0	1	0	19.8413	56	1.68	2.8224	0.93	1.18	12	7.47	88.9	381.32	17.1	3.73	13.37	5.16
2	1	67	3	2	0	0	0	1	0	15.0204	46	1.75	3.0625	1.33	0.8	39.15	4.61	60.5	237.16	12.2	2.53	9.67	5.06
2	1	80	3	2	1	1	0	0	0	23.6713	75	1.78	3.1684	1.55	0.74	18.3	5.28	71.58	343.37	7.2	1.6	5.6	4.69
2	0	66	3	2	1	0	1	0	0	27.3437	70	1.6	2.56	1.24	0.67	13.48	4.99	120.2	128.98	9	1.82	7.18	2.13
2	1	65	3	2	1	1	0	0	0	28.0557	83	1.72	2.9584	1.35	0.65	16.03	8.47	90.11	336.89	34.7	6.1	28.6	2.33
2	0	78	3	2	1	1	1	0	0	26.2596	75	1.69	2.8561	1.3	0.69	7.2	7.06	84.58	484.96	15.1	3.1	12	1.68
2	0	85	3	2	1	1	1	0	0	23.0469	59	1.6	2.56	1.36	0.95	8.56	5.72	60.89	217.76	9.8	2.1	7.7	2.1
2	1	76	3	2	0	0	1	0	0	26.5625	68	1.6	2.56	0.91	0.78	16.08	9.19	59.96	299.96	9.1	2.2	6.9	2.25
2	1	64	3	2	0	1	0	0	1	26.1962	83	1.78	3.1684	1.33	1.3	5.41	7.59	66.48	325.34	15	4.6	10.4	1.93
2	0	86	3	2	1	1	0	0	0	22.3081	60	1.64	2.6896	1.18	0.77	20.97	5.59	50.49	167.53	8.7	1.7	7	3.21
2	1	92	3	2	0	0	1	0	0	23.8754	69	1.7	2.89	1.2	0.68	21.57	10.7	104.56	464.28	13.2	3.3	9.9	3.97
2	0	72	3	2	1	1	1	0	0	22.0386	60	1.65	2.7225	1.33	0.82	32.69	5.47	66.06	459.89	16.6	4.2	12.4	3.41
2	0	78	3	2	1	1	1	0	0	24.6548	60	1.56	2.4336	1.61	1.01	68.5	5.53	54.97	229.62	12.6	2.8	9.8	3.98
2	1	68	4	0	1	1	1	1	0	28.7037	93	1.8	3.24	0.87	0.45	59.39	7.43	77.9	367.37	11.1	2.98	8.12	4.25
2	0	86	4	0	1	1	1	0	0	22.0386	60	1.65	2.7225	1.18	0.68	41.92	7.52	54.7	415.83	8.7	1.99	6.71	2.18
2	0	76	4	0	1	0	1	0	0	28.6851	80	1.67	2.7889	1.41	1.29	10.91	7.53	78.57	370.48	14	2.6	11.4	3.64
2	0	69	4	0	1	1	0	0	0	27.6817	80	1.7	2.89	1.58	1.19	22.04	7.89	45.6	277.47	8.2	1.45	6.75	4.65
2	1	74	4	0	1	0	0	1	1	22.0386	60	1.65	2.7225	1.14	0.83	110.66	6.44	79.9	337.03	10.9	2.4	8.5	2.94
2	0	81	4	1	0	1	1	0	0	20.202	55	1.65	2.7225	1.36	0.72	34.83	5.36	66.76	127.3	8.3	1.9	6.4	3.06
2	1	78	4	1	1	0	1	0	0	19.2653	59	1.75	3.0625	0.99	1.34	30.91	5.23	52.61	281.82	21.2	4.7	16.5	3.21
2	0	87	4	1	0	0	1	0	0	21.4844	55	1.6	2.56	1.55	0.76	7.52	9.29	90.71	324.7	8.1	1.6	6.5	4.7
2	0	68	4	2	1	1	1	1	1	23.6244	62	1.62	2.6244	0.97	1.3	37.28	13.06	743.58	314.74	14	2.3	11.7	2.72
2	1	62	4	2	1	0	1	1	0	27.6817	80	1.7	2.89	1.13	1.34	7.58	5.53	66.4	462.14	8.3	1.32	6.98	2.06
2	0	79	4	2	1	1	1	0	0	26.2222	59	1.5	2.25	1.17	0.88	138.51	5.84	71.76	347.61	8.2	1.3	6.9	3.91
2	1	74	4	2	1	1	0	0	0	27.3437	70	1.6	2.56	0.9	1.29	198.12	3.32	66.5	171.24	8.6	1.45	7.15	4.43
2	0	73	4	2	0	0	0	0	0	27.3437	70	1.6	2.56	1.09	1.55	48.59	5.32	61.8	398.58	11.1	1.24	9.86	4.29
2	1	66	4	2	1	1	1	1	0	22.1443	62.5	1.68	2.8224	1.22	1.22	109.64	5.53	63	286.22	10.7	2.2	8.5	2.38
2	0	72	4	2	1	0	0	0	0	30.8463	85	1.66	2.7556	1.21	1.08	7.82	5.17	65.61	350.16	14.4	3.2	11.2	3.32
2	0	60	4	2	1	1	1	0	0	22.5827	60	1.63	2.6569	0.95	0.64	161.06	15.65	229.72	372.32	5.9	0.66	5.24	3.4
2	0	74	4	2	0	0	0	0	0	27.6888	70	1.59	2.5281	1.05	1.17	56.4	4.65	59.7	368.82	12.5	2.7	9.8	3.47
2	1	87	4	2	1	0	0	0	0	28.699	81	1.68	2.8224	1.02	1.05	33.48	4.01	60.6	268.91	21.2	5	16.2	4.76
2	1	78	4	2	0	1	0	1	0	29.2969	75	1.6	2.56	0.9	1.4	79.39	10.41	104.62	544.68	8.7	1.2	7.5	3.8
2	1	92	5	0	1	1	1	0	0	22.7583	65	1.69	2.8561	0.99	0.97	7.23	9.17	80.62	404.79	19.5	3.1	16.4	3.53
2	1	66	5	0	0	1	0	0	1	18.8272	61	1.8	3.24	0.63	1.29	154.28	4.49	57.4	356.04	12	3.48	8.52	4.12
2	1	69	5	1	0	1	0	1	0	24.9135	72	1.7	2.89	1.12	0.85	104.64	7.51	73.65	319.88	11.9	2.4	9.5	5.55
2	1	97	5	1	1	0	1	0	0	20.202	55	1.65	2.7225	0.95	0.58	4.11	10.22	138.42	499.88	13.8	3.5	10.3	4.38
2	1	63	5	1	1	0	1	0	0	22.5827	60	1.63	2.6569	1.28	0.92	130.24	11.83	121.1	658.25	8.7	1.8	6.9	3.72
2	1	59	5	2	0	1	1	1	0	25.9516	75	1.7	2.89	0.86	1.06	36.1	5.44	85.3	288.01	7	1.6	5.4	3.25
2	1	66	6	0	1	1	1	0	0	25.4694	78	1.75	3.0625	1.34	0.74	32.03	7.22	108.69	545.27	14.5	2.9	11.6	1.93
2	0	76	6	0	1	0	1	1	0	19.1406	49	1.6	2.56	1.23	1.29	30.96	5.19	62.78	203.31	7.6	1.2	6.4	4.04
2	1	80	6	1	1	1	1	0	0	22.0932	70	1.78	3.1684	1.11	1.32	95.33	9.32	77.87	283.13	23.3	5.8	17.5	3.76
2	1	82	6	1	1	1	0	0	0	23.4375	60	1.6	2.56	0.83	0.74	114.58	7.83	69.44	436.7	10.6	2.5	8.1	4.23
2	0	72	6	2	1	0	0	0	0	21.4844	55	1.6	2.56	1.4	0.59	138.73	7.47	103.62	358.35	6.8	1.4	5.4	5.64
2	0	76	6	2	1	0	1	0	0	25.3906	65	1.6	2.56	0.85	0.69	32.07	4.27	77.18	454.31	6.2	1.1	5.1	4.24
